# Supplementary material for: Physicochemical modifications accompanying UV laser induced surface structures on poly(ethylene terephthalate) and their effect on adhesion of mesenchymal cells
Source: Royal Society of Chemistry journal article supplement (doi:10.1039/c4cp02434f), 2014-07-10
Supplement: c4cp02434f1.pdf [file c4cp02434f1.pdf]

## SUPPLEMENTARY INFORMATION

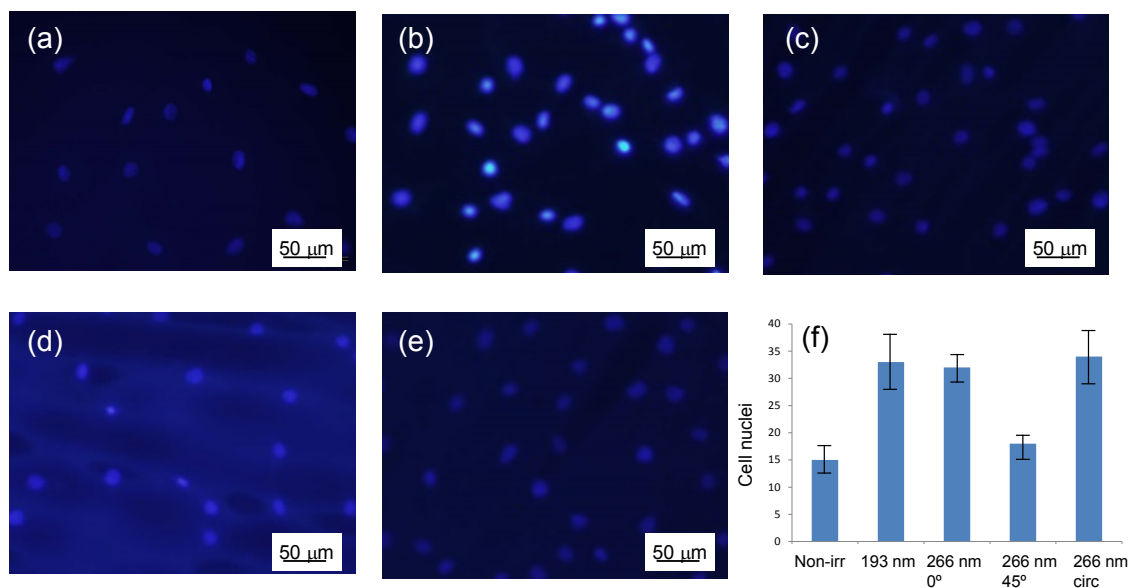

Microscopy images of cell cultured PET films indicating cell adhesion to the different PET substrates: (a) non-irradiated, (b) irradiated at 193 nm, (c) irradiated at 266 nm, linearly polarized, normal incidence, (d) irradiated at 266 nm, linearly polarized, incidence at 45°, (e) irradiated at 266 nm, circularly polarized. (f) Number of cell nuclei as an average of three different microscopy images.
